1     **The Association of COVID-19 Incidence with Sport and Face Mask**  
2                     **Use in United States High School Athletes**

3  
4  
5     Andrew M. Watson, MD, MS,<sup>1</sup> Kristin Haraldsdottir, PhD,<sup>1</sup> Kevin Biese, MA, LAT,<sup>2</sup> Leslie  
6                     Goodavish, PA,<sup>1</sup> Bethany Stevens,<sup>2</sup> Timothy McGuine, PhD, LAT<sup>1</sup>

7  
8                     From the Department of Orthopedics and Rehabilitation,<sup>1</sup>  
9                     University of Wisconsin School of Medicine and Public Health, Madison, WI, and  
10                    The Department of Kinesiology,<sup>2</sup> University of Wisconsin – Madison

11  
12  
13  
14  
15    Address for Correspondence:

16    Andrew Watson

17    Department of Orthopedics and Rehabilitation, Division of Sports Medicine

18    1685 Highland Avenue

19    Madison, WI 53705

20    Phone: (608) 263-6477

21    Fax: (608) 263-0503

22    Email: [Watson@ortho.wisc.edu](mailto:Watson@ortho.wisc.edu)

23

24 **ABSTRACT**

25 **Purpose:** To evaluate the influence of sport characteristics and face mask use on COVID-19  
26 incidence among high school athletes.

27 **Methods:** Surveys were distributed to high school athletic directors throughout the United States  
28 regarding sport re-initiation, COVID-19 cases, and risk reduction procedures in fall 2020.

29 Separate mixed effects Poisson regression models were developed to evaluate the associations  
30 between reported COVID-19 incidence and 1) sport characteristics (contact/non-contact,  
31 individual/team, indoor/outdoor) and 2) face mask use while playing (yes/no).

32 **Results:** 991 schools had restarted fall sports, representing 152,484 athletes on 5,854 teams.  
33 2,565 cases of COVID-19 were reported, representing a case rate of 1,682 cases per 100,000  
34 athletes and an incidence rate of 24.6 cases per 100,000 player-days. COVID-19 incidence was  
35 lower among outdoor versus indoor sports (incidence rate ratio [IRR]=0.54, 95% CI=0.49-0.60,  
36  $p<0.001$ ) and non-contact versus contact sports (IRR=0.78 [0.70-0.87],  $p<0.001$ ), but not team  
37 versus individual sports (IRR=0.96 [0.84-1.1],  $p=0.49$ ). Face mask use was associated with a  
38 decreased incidence in girls' volleyball (IRR=0.53 [0.37-0.73],  $p<0.001$ ), boys' basketball  
39 (IRR=0.53 [0.33-0.83],  $p=0.008$ ) and girls' basketball (IRR=0.36 [0.19-0.63],  $p<0.001$ ), and  
40 approached statistical significance in football (IRR=0.79 [0.59-1.04],  $p=0.10$ ) and cheer/dance  
41 (IRR=0.75 [0.53-1.03],  $p=0.081$ ).

42 **Conclusions:** In this nationwide survey of US high school athletic directors representing  
43 152,484 athletes, lower COVID-19 incidence was independently associated with participation in  
44 outdoor versus indoor and non-contact versus contact sports, but not team versus individual  
45 sports. Face mask use was associated with decreased COVID-19 incidence among indoor sports,  
46 and may be protective among outdoor sports with prolonged close contact between participants.

47

48    Keywords: adolescent; infection; pediatric; SARS-CoV-2

49

## 50 INTRODUCTION

51 In an effort to control the spread of the coronavirus disease 2019 (COVID-19) in spring  
52 2020, restrictions were placed on virtually all facets of American society, including the  
53 cancellation of school and interscholastic athletics. Early research suggests that school and sport  
54 cancellations during the initial months of the COVID-19 pandemic were associated with  
55 significant decreases in physical activity and worsening of depressive symptoms in children and  
56 athletes.<sup>3,6,8</sup> It has been projected that prolonged restriction could contribute significantly to  
57 long-term increases in obesity and mental health disorders.<sup>2,7,15</sup> In a nationwide survey of over  
58 13,000 adolescent athletes in May 2020, 37% reported moderate to severe symptoms of anxiety  
59 and 40% reported moderate to severe symptoms of depression.<sup>9</sup> Together these results suggest  
60 that isolation and physical inactivity during COVID-19 restrictions may represent a significant  
61 threat to physical and mental health in children and adolescents.

62 Nonetheless, efforts to promote the benefits of youth sports participation are necessarily  
63 balanced against the potential risk of COVID-19 transmission. While high school sports have  
64 restarted in many areas of the United States, they remain shut down in other areas, with a lack of  
65 specific evidence to guide decision-making. A number of organizations have developed risk  
66 reduction protocols in an attempt to mitigate the spread of COVID-19 among youth sport  
67 participants, but it is widely recognized that there is very little prior research within sport  
68 environments to guide these decisions.<sup>1,5,11,12,17</sup> The available evidence has been limited to case  
69 reports in adult recreational athletes, media reports of infections among adults and adolescents  
70 associated with interscholastic athletics, and a single evaluation of youth soccer in a small-group,  
71 physically-distanced setting.<sup>4,5,13,18</sup>

72 Organizations have also attempted to classify sports in terms of the risk of COVID-19  
73 transmission during participation. These recommendations are based on a number of  
74 characteristics but differ between organizations, as evidence derived from sport contexts is  
75 lacking.<sup>1,11,12,17</sup> In fact, we are aware of no research which has evaluated the relative risks of  
76 COVID-19 among athletes between different sports or between sport characteristics such as  
77 indoor versus outdoor, individual versus team or contact versus non-contact.

78 Similarly, the recommendations regarding face mask use during sport participation differ  
79 between public health organizations, and the American Academy of Pediatrics (AAP) recently  
80 changed its recommendation to encourage their use among youth athletes during most sport  
81 contexts.<sup>1,10,12,17</sup> Although there is general consensus among the scientific community that face  
82 mask use in community settings can reduce transmission of COVID-19, there is no evidence  
83 specifically within youth sport environments regarding their efficacy, and whether any benefit  
84 differs between sports or sport characteristics. Therefore, the purpose of this study was to  
85 determine the associations between COVID-19 risk and specific sports, sport characteristics, and  
86 face mask use among US high school athletes.

87

## 88 **METHODS**

### 89 **Study Design**

90 All procedures performed in this study were approved by the Institutional Review Board  
91 of the University of Wisconsin-Madison. In collaboration with the National Federation of State  
92 High School Associations (NFHS), surveys were distributed to all state high school athletic  
93 associations in the United States between November 1, 2020 and November 3, 2020. Among  
94 states in which fall high school athletics had restarted, surveys were forwarded on to the athletic

95 directors of high schools within the state. In addition to school name and location, athletic  
96 directors were asked whether they had restarted participation in sports since the initial COVID-  
97 19 restrictions in the spring of 2020. Those schools who reported reinitiating sports were asked  
98 to provide the specific sports and the date of restarting, number of athletes, number of practices  
99 and games, number of COVID-19 cases among athletes, and reported sources of infection (if  
100 known) within each sport during the months of August, September and October 2020. Schools  
101 were asked about their type of instruction during the fall (virtual, in-person) and what restarted  
102 sports were using face masks for players while playing. Schools were included if they had any  
103 sport that had restarted participation during August, September or October 2020.

#### 104 **Statistical Analysis**

105 Data were initially evaluated using descriptive statistics, including estimates of central  
106 tendency (mean, median) and variability (standard deviation, interquartile range, range) for  
107 continuous variables, and counts and percentages for categorical variables. Case rates were  
108 expressed as the number of reported cases per 100,000 players ( $\text{cases} / \text{total number of players} * 100,000$ ) overall and for each sport. Duration of participation for each sport at each school was  
109 determined as the difference in days between the date of restarting and October 31, 2020 and  
110 player-days was determined as the product of the number of participating players and duration.  
111 Incidence rates were expressed as the number of reported cases per 100,000 player-days ( $\text{cases} / \text{total number of player-days} * 100,000$ ) overall and for each sport, with confidence intervals  
112 calculated using an exact method.

115 In addition, the number of cases, total population, case rate and incidence rate during  
116 August, September, and October were determined for each state in which a respondent high  
117 school was located, from publicly available online information aggregated from the US Centers

118 for Disease Control and local health authorities.<sup>19</sup> In order to determine whether background  
119 state COVID-19 rates were associated with reported COVID-19 rates among high school  
120 athletes, the total number of athletes and COVID-19 cases were aggregated by state. For those  
121 states with >100 athletes, the relationship between COVID-19 case rates among high school  
122 athletes and the general population were evaluated with a linear regression model weighted for  
123 the number of players from each state.

124 For those sports with data from 50 or more schools, the relative risk of each sport was  
125 evaluated using a mixed effects Poisson regression model to predict the number of COVID-19  
126 cases for each team with local incidence, instructional delivery type (in-person, virtual), and  
127 sport as fixed effects, school as a random effect, and the log of player-days as an offset, yielding  
128 an incidence rate ratio (IRR) with Soccer – Boys as the reference (since it represented the median  
129 unadjusted incidence rate and is typically considered a moderate risk sport). To evaluate the  
130 independent relationships between COVID-19 cases and sport characteristics, a mixed effects  
131 Poisson regression model was developed to predict the number of cases with local incidence,  
132 instructional delivery type, sport location (indoor, outdoor), sport contact (contact, non-contact),  
133 and sport type (individual, team) as fixed effects, school as a random effect and the log of player-  
134 days as an offset including data from all sports reported. The specific sports that were reported  
135 and their respective characteristics are shown in Supplemental Table 1.

136 To evaluate the association between overall COVID-19 incidence and reported face mask  
137 use, a mixed effects Poisson regression model was developed to predict the number of cases for  
138 each team, with local incidence, instructional delivery type, and face mask use (yes/no) as fixed  
139 effects, school as a random effect and the log of player-days as an offset. Similar, separate  
140 models were developed for each sport characteristic (indoor, outdoor, contact, non-contact,

141 individual, team) and each specific sport with greater than 40 reported cases. Within each of  
142 these sports, incidence rates and 95% confidence intervals were calculated within each sport for  
143 those teams reporting face mask use or not and compared descriptively. Swimming was excluded  
144 from the face mask analyses. Coefficients from Poisson models were exponentiated to represent  
145 IRRs for binary variables and Wald confidence intervals were generated. Significance level was  
146 determined *a priori* at the 0.05 level and all tests were 2-tailed. All statistical analyses were  
147 performed in R.<sup>14</sup>

148

## 149 **RESULTS**

150 1,508 schools submitted survey responses, of which 991 schools had restarted a fall sport.  
151 These schools represented 152,484 student-athletes on 5,854 teams that had participated in  
152 159,947 practices and 48,582 games. Eight hundred eighty-nine (89.7%) respondent schools  
153 reported utilizing in-person instruction during the fall of 2020. Among the schools that had  
154 restarted participation, 2,565 cases of COVID-19 were reported, yielding a case rate of 1,682  
155 cases per 100,000 athletes and an incidence rate of 24.6 (95% CI = 23.7-25.6) cases per 100,000  
156 player-days. Of the cases with a reported, known source, 870 (55%) were attributed to  
157 household contact followed by community contact outside sport or school (516, 32%), school  
158 contact (115, 7.3%), sport contact (69, 4.3%) and other (24, 1.5%). For those sports with greater  
159 than 50 participating schools, the unadjusted COVID-19 incidence rate ranged from 10.4 (Tennis  
160 – Boys) to 52.0 cases per 100,000 player-days (Basketball - Girls), as shown in Figure 1 (full  
161 data for all sports is available in Supplementary Table 2).

162 When aggregated by state, the overall COVID-19 case rates for athletes were highly  
163 correlated with the case rates for their respective state's general population ( $\beta = 1.09 \pm 0.16$ ,  $r =$



164 0.81,  $p < 0.001$ ; see Figure 2). The COVID-19 IRRs for specific sports, adjusted for state  
165 COVID-19 incidence, instruction delivery type and school repeated measures are shown in  
166 Figure 3. After adjusting for state COVID-19 incidence and school instruction type, reported  
167 COVID-19 incidence among high school athletes was significantly and independently lower  
168 among outdoor versus indoor sports (IRR=0.54 [0.49-0.60],  $p < 0.001$ ) and non-contact versus  
169 contact sports (0.78 [0.70-0.87],  $p < 0.001$ ), while no association was identified with respect to  
170 team versus individual sports (0.96 [0.84-1.1],  $p = 0.49$ ).

171 284 schools (28%) reported face mask use by players while playing certain sports,  
172 representing 1,677 (28.6%) of all teams participating during the study period. Overall, teams  
173 reporting face mask use did not have a lower incidence of COVID-19 among players (IRR =  
174 0.94 [95% CI = 0.75-1.16],  $p = 0.55$ ). However, COVID-19 incidence was lower with face mask  
175 use among players participating in indoor sports (Table 1). For those sports with greater than 40  
176 reported cases, differences in COVID-19 incidence between teams with and without face mask  
177 use within each sport are shown in Figure 4. Finally, face mask use was associated with a  
178 decreased COVID-19 incidence in girls' volleyball, girls' basketball, and boys' basketball, and  
179 approached significance in football and cheer/dance, but no association was identified in other  
180 sports (Table 2).

181

## 182 **DISCUSSION**

183 These findings suggest that the incidence of COVID-19 among US high school athletes  
184 in the fall of 2020 differs between sports and sport characteristics. Although only a small  
185 proportion of the cases with a reported source were attributed to sport contact, indoor location  
186 and contact were independently associated with an increased incidence rate of COVID-19. This

187 is the first evidence we are aware of that has been derived specifically from a high school sport  
188 context, but it is in agreement with prior research and recommendations from various public  
189 health organizations that have suggested that COVID-19 is most likely to be transmitted between  
190 individuals in close proximity for prolonged periods, and may be more easily transmissible  
191 indoors than outdoors.<sup>1,12,17</sup> Specifically, sport participation indoors versus outdoors appeared to  
192 have the strongest influence on COVID-19 incidence within our represented group of athletes,  
193 while contact had an independent, yet weaker relationship. We did not find an independent  
194 association between COVID-19 incidence and team versus individual sport participation,  
195 suggesting that this effect is minimal after accounting for the influences of location and contact.

196 Public health organizations and sport governing bodies have attempted to classify sports  
197 based on expected risk of COVID-19 transmission,<sup>1,11,12,17</sup> although we are aware of no prior  
198 evidence that has evaluated these within sport environments. With respect to the risk categories  
199 offered for high school athletics by NFHS,<sup>12</sup> our findings are in agreement with the suggestion  
200 that outdoor, non-contact sports have the lowest COVID-19 incidence. These data also align  
201 with the suggestion that sports with close, sustained contact may carry a relatively increased risk,  
202 but suggest that indoor location may have the strongest influence on COVID-19 risk. However,  
203 it should be noted that wrestling demonstrated an intermediate risk despite being an indoor sport  
204 with prolonged, close contact between participants. It is unclear why this would be the case,  
205 although the sample size within this sport was relatively small and consequently the confidence  
206 intervals were relatively wide, making it difficult to classify the risk associated with this specific  
207 sport with confidence.

208 It should be recognized that not all sports reported participation during the same  
209 timeframe and may therefore have had differing background COVID-19 incidence during their

210 respective seasons. Nationwide COVID-19 cases decreased through August and were relatively  
211 stable during September, but began increasing in October.<sup>16</sup> Although we tried to account for  
212 differences in local COVID-19 disease burden within our adjusted models by including state  
213 COVID-19 rates during the fall months, we cannot exclude the possibility that the higher  
214 incidence among traditional winter sports may be partly due to higher local COVID-19 incidence  
215 later in the study period when these sports began participation.

216 We found that face mask use was associated with a decreased incidence of COVID-19  
217 among specific sports. In general, those sports with the highest incidence of COVID-19 were  
218 also found to have the greatest benefit from reported face mask use. Specifically, COVID-19  
219 incidence was lower among indoor sports in which face masks were reportedly used when  
220 evaluated collectively, but this was also true within volleyball, girls' basketball, and boys'  
221 basketball when evaluated individually. Importantly, reported COVID-19 incidence among  
222 indoor team sports (volleyball, basketball) when using face masks appeared comparable to the  
223 incidence among outdoor team sports, suggesting that the increased risk associated with being  
224 indoors may be reduced considerably by face mask use. Face mask use also appeared to be  
225 associated with a decreased COVID-19 incidence in football and cheer/dance, although this did  
226 not reach statistical significance. This may be attributable to the relatively small proportion of  
227 the teams in these sports that reported face mask use, and a larger sample of teams using face  
228 masks in these sports may have revealed a significant association.

229 While face mask use was not found to be associated with COVID-19 incidence among  
230 other outdoor contact sports, "contact" as a sport characteristic surely exist along a continuum  
231 with respect to the time spent in close proximity to other players. The risk of COVID-19  
232 transmission likely varies between sports with brief contact and relatively little time spent within

233 close proximity to others, to sports with prolonged periods of close contact that constitute an  
234 increased likelihood of sufficient exposure for COVID-19 transmission between participants.  
235 This supports the suggestion that although face mask use did not appear to have a large effect  
236 within sports like soccer, it may still be protective in an outdoor sport with sustained close  
237 contact.<sup>1</sup>

238 Face mask use in the community has been widely recommended by public health  
239 agencies but remains a contentious issue within the public at large. Within sports,  
240 recommendations differ between organizations, and recently the AAP revised their  
241 recommendations regarding face mask use in youth sports, suggesting that they be used in most  
242 sports contexts when it is safe to do so.<sup>1</sup> These differences likely represent the fact that there has  
243 been no primary evidence regarding the utility of face masks to reduce COVID-19 transmission  
244 during sport participation. While we cannot directly evaluate the true transmission rate within  
245 the data available, our findings nonetheless suggest that face masks may have a meaningful  
246 influence on COVID-19 risk among indoor sports and outdoor sports with sustained close  
247 contact, but less influence among outdoor sports with less time spent in close proximity to other  
248 players.

249 Although we were unable to identify publicly available, state-specific, adolescent case  
250 rates during the fall months for many of the represented states within our sample, we nonetheless  
251 identified a strong relationship between reported COVID-19 case rates in our high school  
252 athletes and the COVID-19 case rates among the general population in their respective states. In  
253 addition, the majority of cases with a reported source were attributed to household and  
254 community contact with a much smaller proportion attributed to school or sport contact. This  
255 may suggest that COVID-19 incidence among adolescent athletes is largely reflective of

256 background COVID-19 rates within their community. The overwhelming majority of schools  
257 reported in-person instruction, making it difficult to fully evaluate the role of in-person school  
258 instruction in COVID-19 incidence among high school athletes. Nonetheless, we included school  
259 instruction type within our adjusted models in order to account for the potential confounding role  
260 this could play in comparing different groups. Importantly, it should be recognized that this  
261 study cannot comment on the incidence or transmission risk of COVID-19 among attendees at  
262 high school sporting events such as fans, coaches, staff, and spectators. While this risk remains  
263 undefined, it nonetheless represents a potential contribution to community COVID-19 spread and  
264 risk mitigation procedures should continue to be prioritized to not only protect athletes but also  
265 to help reduce the risk of infection among attendees.

266         This study has several limitations. The information is self-reported by the athletic  
267 directors of each school and cannot be directly verified through medical records or another  
268 independent source. Local, state-level daily COVID-19 case data was often not available for  
269 adolescents or children, so our adjusted models could only account for the population-level  
270 background incidence from each state. Nonetheless, we found that reported case rates from our  
271 sample and the case rates from the state general populations were highly related. As mentioned  
272 above, the incidence of COVID-19 was likely not stable throughout the fall in many areas, and  
273 those sports that initiated play during periods of increased local incidence (winter sports in  
274 October, for example) may be biased toward a higher incidence that is not directly attributable to  
275 the sport itself. Reported sources of infection were provided by the schools themselves and not  
276 through formal contact tracing by local health authorities. We cannot directly account for the  
277 possibility of transmission between players that went unidentified. Finally, while this data

278 represents information regarding a large number of male and female high school athletes from a  
279 nationwide sample, it may not be generalizable to other populations.

280 In conclusion, this study suggests that certain high school sports and sport characteristics  
281 may have a greater relative risk of COVID-19 and that face mask use may help reduce the risk of  
282 COVID-19 among adolescent athletes in sports with higher risk. Specifically, indoor sports  
283 appear to have a greater risk of COVID-19 infection among participants, while outdoor, non-  
284 contact sports have the lowest risk. However, face mask utilization was associated with a  
285 significantly decreased incidence of COVID-19 in indoor sports, and this appeared to mitigate a  
286 large portion of the increased risk. Given the general lack of information regarding COVID-19  
287 risk among youth sport participants, this information may help guide decision-making to reduce  
288 the risk of COVID-19 transmission, while facilitating the wide-ranging physical and mental  
289 health benefits of sport participation.

290 **REFERENCES**

- 291 1. American Academy of Pediatrics. COVID-19 Interim Guidance: Return to Sports.  
292 [https://services.aap.org/en/pages/2019-novel-coronavirus-covid-19-](https://services.aap.org/en/pages/2019-novel-coronavirus-covid-19-infections/clinical-guidance/covid-19-interim-guidance-return-to-sports/)  
293 [infections/clinical-guidance/covid-19-interim-guidance-return-to-sports/](https://services.aap.org/en/pages/2019-novel-coronavirus-covid-19-infections/clinical-guidance/covid-19-interim-guidance-return-to-sports/). Accessed  
294 December 21, 2020.
- 295 2. An R. Projecting the impact of the coronavirus disease-2019 pandemic on childhood  
296 obesity in the United States: A microsimulation model. *J Sport Health Sci*.  
297 2020;9(4):302-312.
- 298 3. Bates LC, Zieff G, Stanford K, et al. COVID-19 Impact on Behaviors across the 24-  
299 Hour Day in Children and Adolescents: Physical Activity, Sedentary Behavior, and  
300 Sleep. *Children (Basel)*. 2020;7(9).
- 301 4. commercialappeal.com. Most school-associated COVID-19 cases in Shelby County  
302 are sports-related, officials say.  
303 [https://www.commercialappeal.com/story/news/education/2020/10/22/most-](https://www.commercialappeal.com/story/news/education/2020/10/22/most-school-associated-covid-19-cases-shelby-county-sports-related-officials-say/3735873001/)  
304 [school-associated-covid-19-cases-shelby-county-sports-related-officials-](https://www.commercialappeal.com/story/news/education/2020/10/22/most-school-associated-covid-19-cases-shelby-county-sports-related-officials-say/3735873001/)  
305 [say/3735873001/](https://www.commercialappeal.com/story/news/education/2020/10/22/most-school-associated-covid-19-cases-shelby-county-sports-related-officials-say/3735873001/). Accessed December, 21, 2020.
- 306 5. Drezner JA, Drezner SM, Magner KN, Ayala JT. COVID-19 Surveillance in Youth  
307 Soccer During Small Group Training: A Safe Return to Sports Activity. *Sports Health*.  
308 2021;13(1):15-17.
- 309 6. Dunton GF, Do B, Wang SD. Early effects of the COVID-19 pandemic on physical  
310 activity and sedentary behavior in children living in the U.S. *BMC Public Health*.  
311 2020;20(1):1351.
- 312 7. Golberstein E, Wen H, Miller BF. Coronavirus Disease 2019 (COVID-19) and Mental  
313 Health for Children and Adolescents. *JAMA Pediatr*. 2020.
- 314 8. Gouttebarga V, Ahmad I, Mountjoy M, Rice S, Kerkhoffs G. Anxiety and Depressive  
315 Symptoms During the COVID-19 Emergency Period: A Comparative Cross-Sectional  
316 Study in Professional Football. *Clin J Sport Med*. 2020.
- 317 9. McGuine TA, Biese KM, Petrovska L, et al. The health of US adolescent athletes  
318 during Covid-19 related school closures and sport cancellations. *Journal of athletic*  
319 *training*. 2020.
- 320 10. National Athletic Trainers Association. COVID-19 Return to Sport Considerations for  
321 Secondary School Athletic Trainers.  
322 [https://www.nata.org/sites/default/files/covid\\_19\\_return-to-](https://www.nata.org/sites/default/files/covid_19_return-to-sport_considerations_for_secondary_school_ats_1.pdf)  
323 [sport\\_considerations\\_for\\_secondary\\_school\\_ats\\_1.pdf](https://www.nata.org/sites/default/files/covid_19_return-to-sport_considerations_for_secondary_school_ats_1.pdf). Accessed September 22,  
324 2020.
- 325 11. National Collegiate Athletics Association. Resocialization of Collegiate Sport:  
326 Checklist. [http://www.ncaa.org/sport-science-institute/resocialization-collegiate-](http://www.ncaa.org/sport-science-institute/resocialization-collegiate-sport-checklist)  
327 [sport-checklist](http://www.ncaa.org/sport-science-institute/resocialization-collegiate-sport-checklist).
- 328 12. National Federation of State High School Associations. Guidance For Opening Up  
329 High School Athletics And Activities.
- 330 13. New York Times. College Sports Has Reported at Least 6,629 Virus Cases. There Are  
331 Many More. [https://www.nytimes.com/2020/12/11/sports/coronavirus-college-](https://www.nytimes.com/2020/12/11/sports/coronavirus-college-sports-football.html)  
332 [sports-football.html](https://www.nytimes.com/2020/12/11/sports/coronavirus-college-sports-football.html).

- 333 14. Record #133 is using an undefined reference type. If you are sure you are using the  
334 correct reference type, the template for that type will need to be set up in this  
335 output style.
- 336 15. Singh S, Roy D, Sinha K, et al. Impact of COVID-19 and lockdown on mental health of  
337 children and adolescents: A narrative review with recommendations. *Psychiatry Res.*  
338 2020;293:113429.
- 339 16. US Centers for Disease Control and Prevention. CDC COVID Data Tracker.  
340 [https://covid.cdc.gov/covid-data-tracker/#trends\\_dailytrendscases](https://covid.cdc.gov/covid-data-tracker/#trends_dailytrendscases). Accessed  
341 December 30, 2020.
- 342 17. US Centers for Disease Control and Prevention. Considerations for Youth Sports.  
343 [https://www.cdc.gov/coronavirus/2019-ncov/community/schools-  
344 childcare/youth-sports.html](https://www.cdc.gov/coronavirus/2019-ncov/community/schools-childcare/youth-sports.html).
- 345 18. US Centers for Disease Control and Prevention. An Outbreak of COVID-19 Associated  
346 with a Recreational Hockey Game - Florida, June 2020.  
347 <https://www.cdc.gov/mmwr/volumes/69/wr/mm6941a4.htm>. Accessed  
348 December 21, 2020.
- 349 19. USAFACTS.org. US Coronavirus Cases and Deaths.  
350 <https://usafacts.org/visualizations/coronavirus-covid-19-spread-map/>. Accessed  
351 January 7, 2021.
- 352

353



354 Figure Legends

355 Figure 1. Unadjusted incidence rates of COVID-19 among United States high school sports  
356 during fall 2020. Incidence rate is shown as reported cases per 100,000 player-days for those  
357 sports with greater than 50 schools reporting re-initiation.

358 Figure 2. Reported COVID-19 case rates for high school athletes and the general population of  
359 their respective states during the fall of 2020. Size of points scaled to number of players from  
360 each state and dashed line represents a line of equality. Solid line and shaded area represent  
361 regression line and 95% confidence interval from linear model weighted for number of players  
362 from each state.  $r$  = correlation coefficient.

363 Figure 3. COVID-19 incidence rate ratios during fall 2020 for United States high school sports,  
364 adjusted for local (state) COVID-19 incidence, instructional delivery type and repeated measures  
365 from the same school. Includes those sports with greater than 50 schools reporting participation,  
366 with Soccer – Boys as reference. \* $p < 0.05$ .

367 Figure 4. Unadjusted COVID-19 incidence rates reported among US athletes in the fall 2020,  
368 comparing teams with or without reported face mask use, within each sport.

369

370 Table 1. The association of reported face mask use with COVID-19 incidence within each sport  
371 characteristic among US high school athletes during fall 2020.<sup>a</sup>

| Sport Characteristic | N (%)       | IRR (95% CI)     | p      |
|----------------------|-------------|------------------|--------|
| <i>Indoor</i>        | 305 (23.5%) | 0.44 (0.29-0.66) | <0.001 |
| Outdoor              | 773 (18.4%) | 1.02 (0.80-1.31) | 0.88   |
| Individual           | 441 (17.7%) | 0.89 (0.64-1.25) | 0.50   |
| Team                 | 637 (21.2%) | 0.92 (0.70-1.20) | 0.52   |
| Contact              | 452 (20.9%) | 0.86 (0.63-1.18) | 0.36   |
| Non-Contact          | 626 (18.8%) | 0.88 (0.66-1.16) | 0.36   |

372 <sup>a</sup>Incidence rate ratios and Wald confidence intervals from separate mixed effects Poisson models  
373 within each sport characteristic to predict COVID-19 cases with local incidence and face mask  
374 use (yes/no) as fixed effects, school as a random effect and log(player-days) as an offset; CI =  
375 Confidence Interval; IRR=Incidence Rate Ratio.

376

377 Table 2. The association of reported face mask use with COVID-19 incidence within each sport  
 378 among US high school athletes during fall 2020.<sup>a</sup>

| Sport                     | N (%)              | IRR (95% CI)            | p                |
|---------------------------|--------------------|-------------------------|------------------|
| Baseball                  | 39 (26.4%)         | 1.2 (0.44-2.93)         | 0.69             |
| <i>Basketball - Boys</i>  | <i>74 (25.7%)</i>  | <i>0.53 (0.33-0.83)</i> | <i>0.0084</i>    |
| <i>Basketball - Girls</i> | <i>78 (22.6%)</i>  | <i>0.36 (0.19-0.63)</i> | <i>&lt;0.001</i> |
| Cheer/Dance               | 96 (18.3%)         | 0.75 (0.53-1.03)        | 0.081            |
| Cross Country             | 123 (15.7%)        | 0.86 (0.53-1.31)        | 0.5              |
| Football                  | 94 (14.0%)         | 0.79 (0.59-1.04)        | 0.10             |
| Golf - Boys               | 69 (18.9%)         | 0.57 (0.17-1.42)        | 0.28             |
| Soccer - Boys             | 74 (24.5%)         | 1.1 (0.65-1.71)         | 0.77             |
| Soccer - Girls            | 70 (20.5%)         | 1.3 (0.76-2.18)         | 0.3              |
| Softball                  | 39 (17.3%)         | 0.53 (0.12-1.71)        | 0.34             |
| <i>Volleyball - Girls</i> | <i>120 (22.0%)</i> | <i>0.53 (0.37-0.73)</i> | <i>&lt;0.001</i> |

379 <sup>a</sup>Incidence rate ratios and Wald confidence intervals from separate mixed effects Poisson models  
 380 within each sport to predict COVID-19 cases with local incidence, school instruction type, and  
 381 face mask use (yes/no) as fixed effects, school as a random effect and log(player-days) as an  
 382 offset; CI = Confidence Interval; IRR=Incidence Rate Ratio.

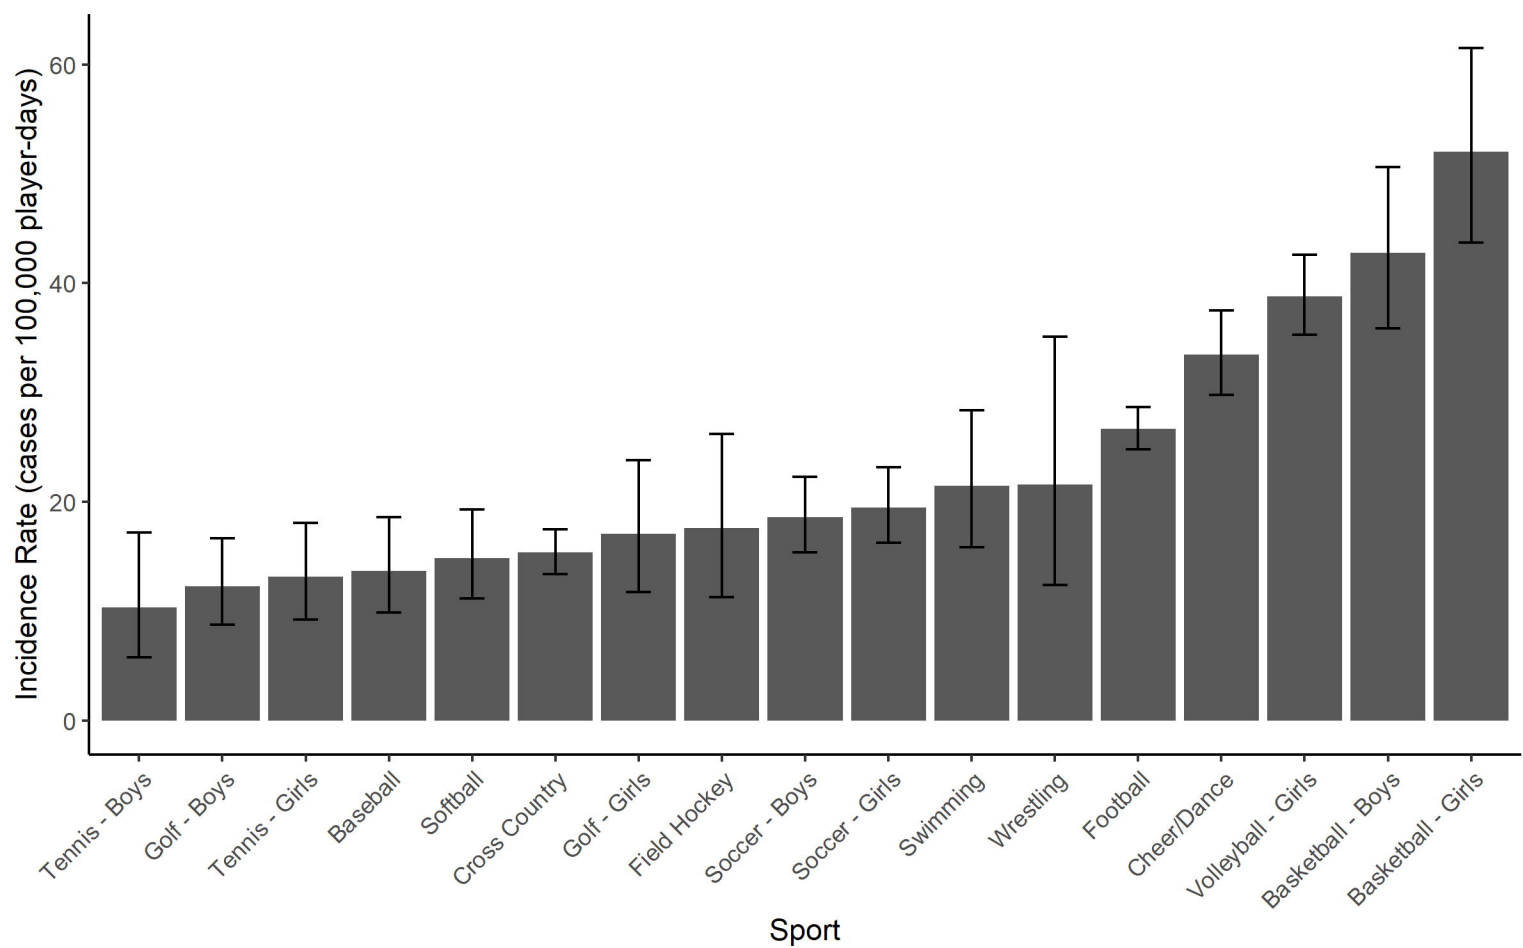

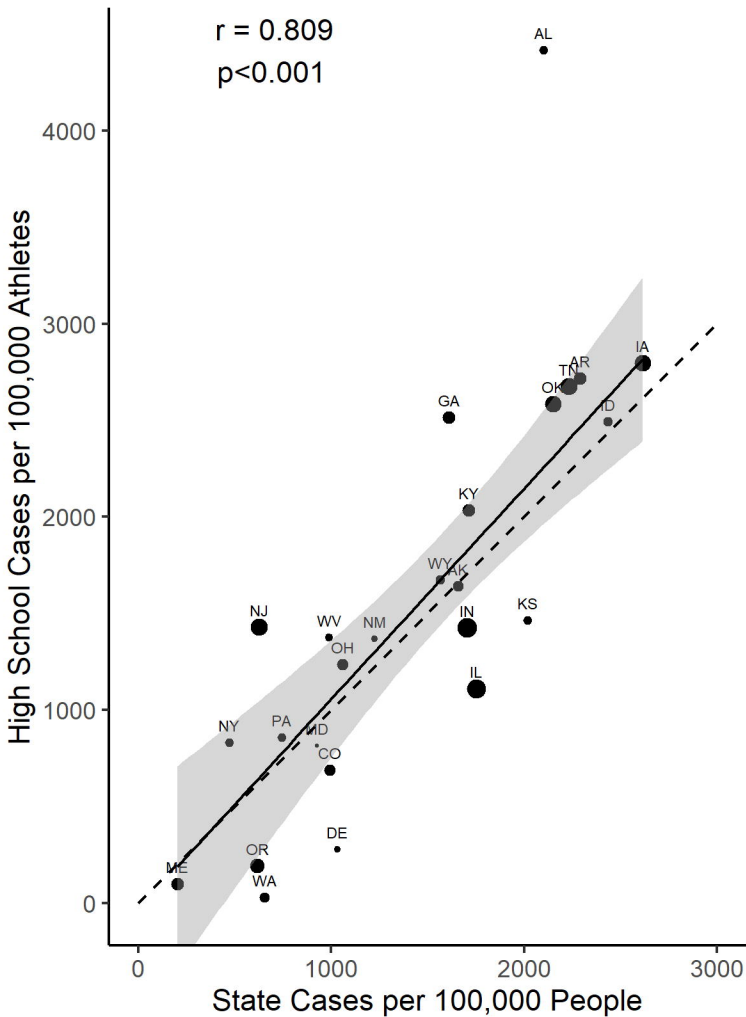

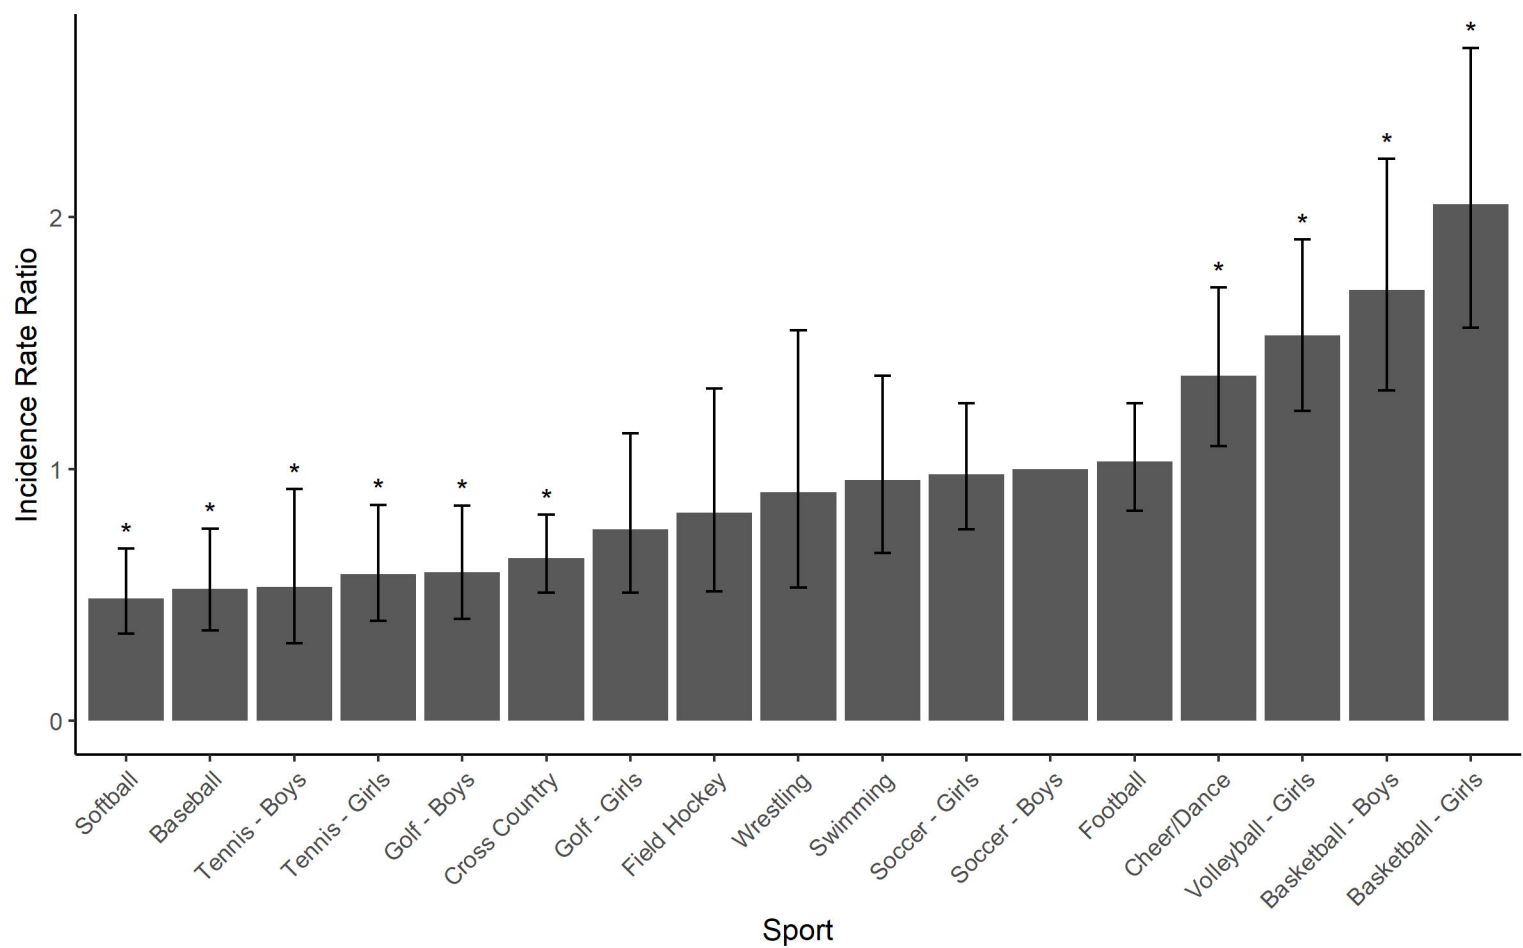

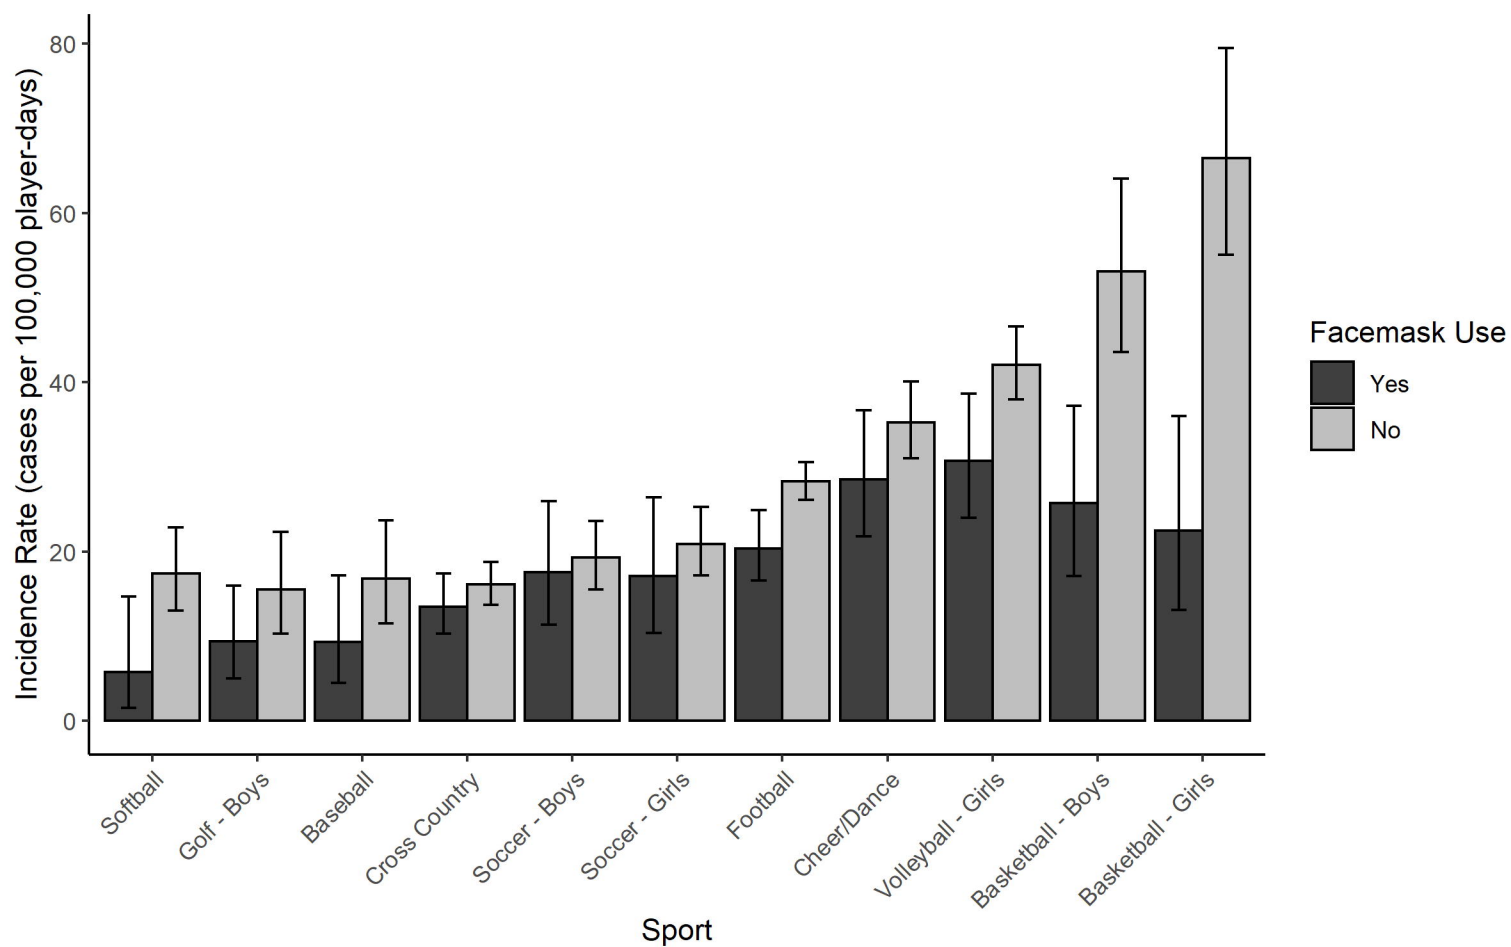

Source: https://medrxiv.org/content/10.1101/2021.01.19.21250116v1.full.pdf
